# Supplementary material
Source: PubMed Central journal article supplement (PMC5006229)
Supplement: eabfb23130b80f5a75aade7f0fea0735_brain-2015-01804-File010.pdf [file eabfb23130b80f5a75aade7f0fea0735_brain-2015-01804-File010.pdf]

**S Figure 1** Astrocyte numbers are not affected by microglial elimination. **A, B**, 20X images of immunolabeling of astrocytes with GFAP (green) and S100 $\beta$  (blue) and plaques with 6E10 (red) in the cortex and hippocampus. **C**, Quantification revealed significant increases in GFAP<sup>+</sup> and S100 $\beta$ <sup>+</sup> cells in the 5xfAD mice compared to Control (via two-way ANOVA,  $p < 0.001$ ) and in 5xfAD + PLX3397 mice compared to PLX3397-treated mice (via two way ANOVA,  $p < 0.001$ ). **D**, Representative 63X images of astrocytes and plaques in the cortex. **E, F**, 20X images of immunolabeling of astrocytes with GFAP (red) and Aldh1L1 (blue) with Thio-S staining plaques (green) in the cortex and hippocampus. **G**, Representative 63X images of astrocytes and plaques in the cortex. **H**, Quantification of Aldh1L1<sup>+</sup> cells showed no changes in expression with microglial elimination. Statistical significance is denoted by \* $P < 0.05$ . Error bars indicate SEM; (n=7/group).

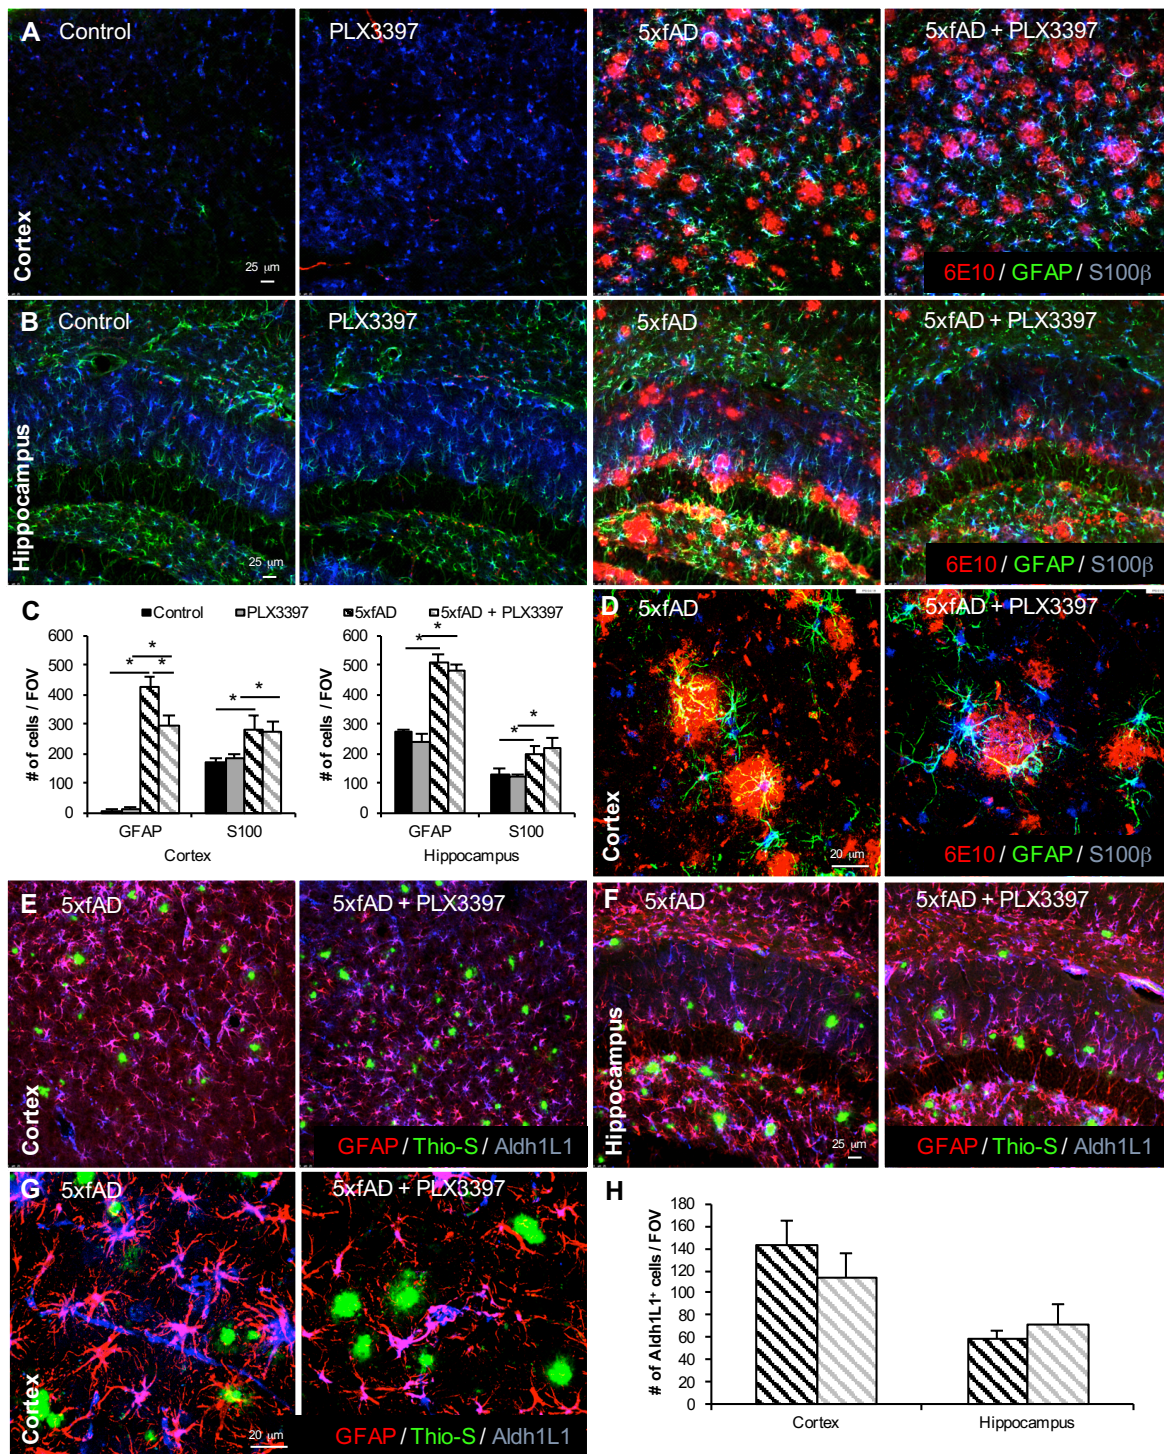

S Figure 1
